# Supplementary material for: Organic nanostructured host–guest materials for luminescent solar concentrators
Source: Royal Society of Chemistry journal article supplement (doi:10.1039/c2ta00632d), 2012-11-22
Supplement: c2ta00632d.pdf [file c2ta00632d.pdf]

## Supporting Information

### **Organic nanostructured host-guest materials for sustainable Luminescent Solar Concentrators**

*Chiara Botta,<sup>\*a</sup> Paolo Betti<sup>a</sup> and Mariacecilia Pasini<sup>a</sup>*

5

*<sup>a</sup> Istituto per lo Studio delle Macromolecole, ISMAC, CNR Via Bassini 15, 20133 Milano, Italy. Fax: 0039.02.70636400; Tel: 0039.02.23699734;*

*E-mail: c.botta@ismac.cnr.it*

10

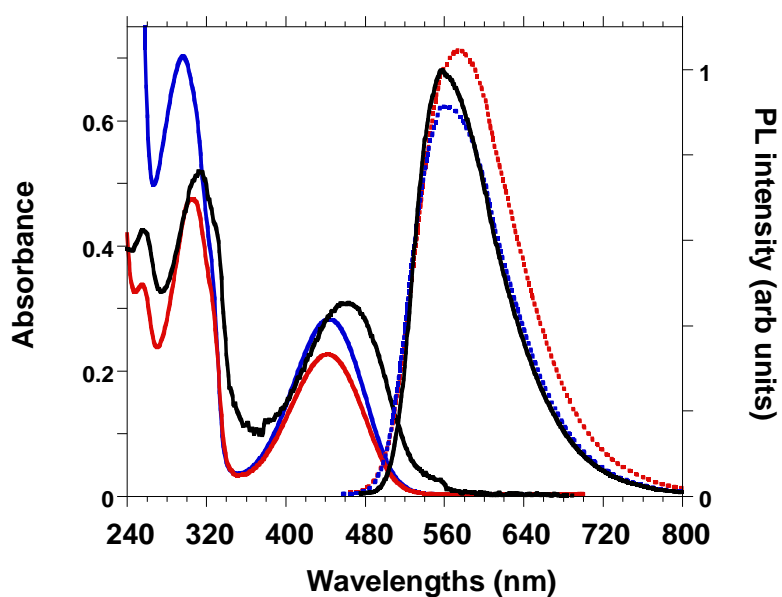

Fig.S1 Optical absorption (solid line) and photoluminescence (dotted line) of DBT in ethylacetate solution (blue), dichloromethane solution (red), and film of DBT-DCA spin coated from tetrahydrofuran solution (black).

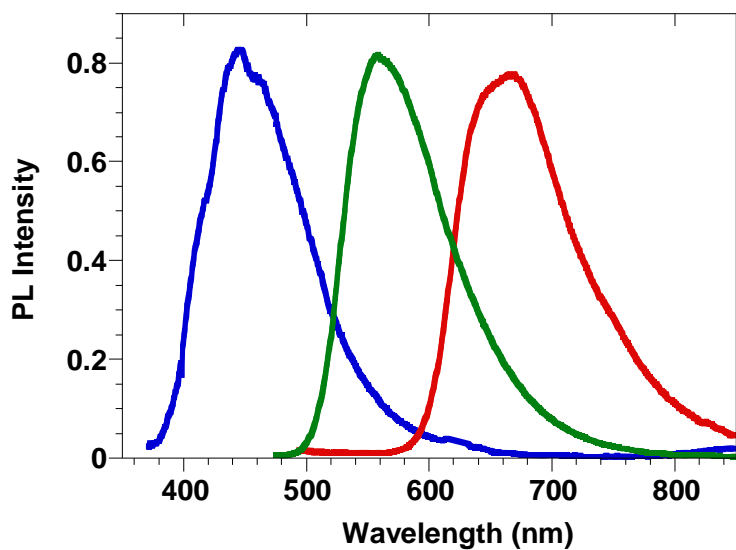

5

Fig.S2 Photoluminescence spectra of DPH (blue), DBT (green) and DBTT (red) inclusion compounds for DCA film spin coated from tetrahydrofuran solution.

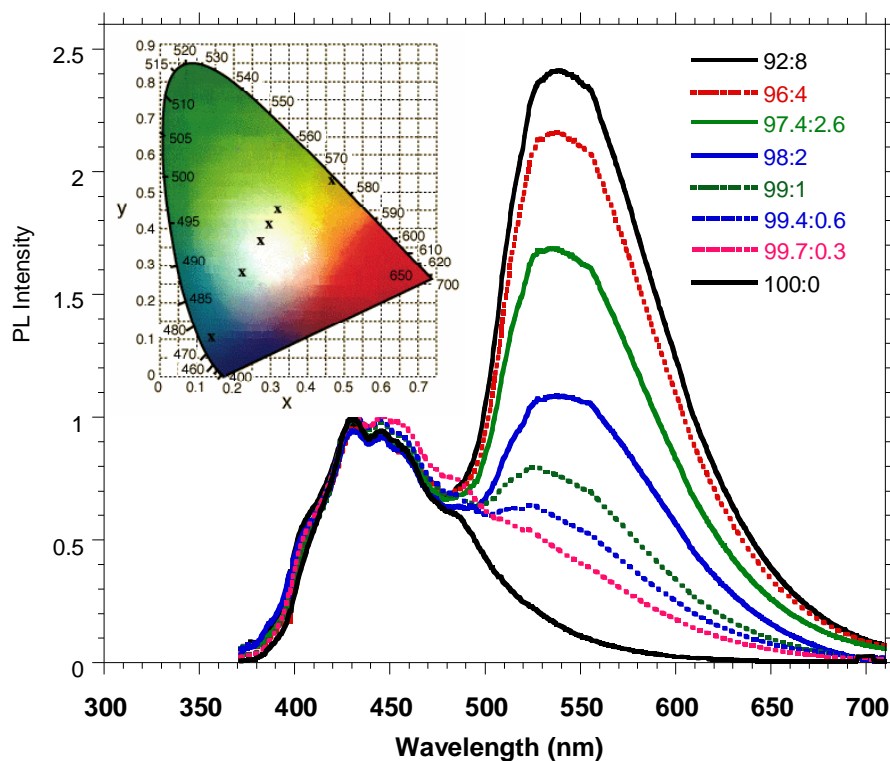

**Fig. S3** Photoluminescence spectra of films of DPH:DBT co-inclusion compounds in DCA deposited on quartz substrates from THF solution for DPH:DBT relative molar ratios ranging from (100:0) to (92:8). In the inset the CIE diagram reports the coordinates of the emission of the films.

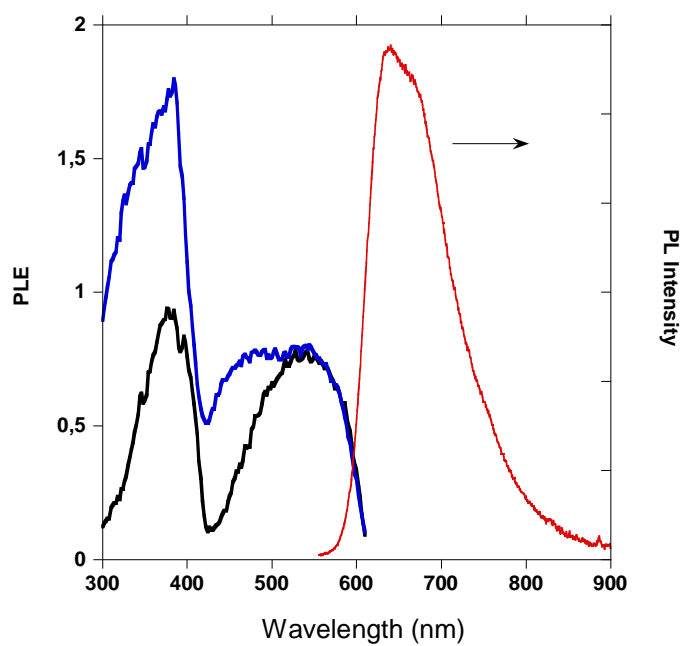

**Fig. S4** Fluorescence excitation profiles PLE of DBTT-DCA (black line) and DPH:DBT:DBTT-DCA (75.5:11.4:13.1) (blue line) (left), and PL of DBTT-DCA (right) films cast from solution.
